# Supplementary material
Source: HighWire-hosted journal article supplement (https://ijgc.bmj.com/content/ijgc-2023-004307)
Supplement: inline-supplementary-material-1 [file inline-supplementary-material-1.pdf]

## Box S1: Variable descriptions

| <b>Variables</b>                | <b>Descriptions</b>                                                                                                                                                                                                                                                                                                                                                            |
|---------------------------------|--------------------------------------------------------------------------------------------------------------------------------------------------------------------------------------------------------------------------------------------------------------------------------------------------------------------------------------------------------------------------------|
| <b>Patient demographics</b>     |                                                                                                                                                                                                                                                                                                                                                                                |
| Age at diagnosis                | Defined at time of filling in questionnaire shortly after diagnosis                                                                                                                                                                                                                                                                                                            |
| Educational level at diagnosis  | Defined as low: primary or secondary education or less, medium: vocational education, and high: university or higher education.                                                                                                                                                                                                                                                |
| Parity at diagnosis             | Yes / no                                                                                                                                                                                                                                                                                                                                                                       |
| Smoking status at diagnosis     | Classified as never smoker, former smoker, and current smoker                                                                                                                                                                                                                                                                                                                  |
| Family history of cancer        | Yes / no                                                                                                                                                                                                                                                                                                                                                                       |
| Frailty at diagnosis            | Evaluated by Groningen Frailty Index (GFI). Defined as < 4: non-frail, > 4: frail.                                                                                                                                                                                                                                                                                             |
| <b>Clinical data</b>            |                                                                                                                                                                                                                                                                                                                                                                                |
| Histology at diagnosis          | Classified as high-grade serous, low-grade serous, mucinous, endometrioid, clear cell, carcinosarcoma, adenocarcinoma NOS                                                                                                                                                                                                                                                      |
| FIGO stage at diagnosis         | Classified as I, II, III, IV.                                                                                                                                                                                                                                                                                                                                                  |
| Performance status at diagnosis | Evaluated according to WHO/ECOG criteria. Defined as 0: fully active, 1: restricted in physical strenuous activity, 2: ambulatory and capable of selfcare but unable to carry out any other work activities, in bed <50% of waking hours, 3: capable of only limited selfcare, in bed >50% of waking hours, 4: completely disabled, totally confined to bed or chair, 5: dead. |
| <b>BRCA1/2 tests</b>            |                                                                                                                                                                                                                                                                                                                                                                                |
| Tumor test performed            | Yes / no                                                                                                                                                                                                                                                                                                                                                                       |
| Germline test performed         | Yes / no                                                                                                                                                                                                                                                                                                                                                                       |
| Date of tumor / germline test   | Day / month / year                                                                                                                                                                                                                                                                                                                                                             |
| Tumor test result               | Classified as: no tumor pathogenic variant, tumor pathogenic variant in <i>BRCA1</i> or tumor pathogenic variant in <i>BRCA2</i>                                                                                                                                                                                                                                               |
| Germline test result            | Classified as: no germline pathogenic variant, germline pathogenic variant in <i>BRCA1</i> or germline pathogenic variant in <i>BRCA2</i>                                                                                                                                                                                                                                      |

Table S1: Known *BRCA1/2* germline pathogenic variant status by time since diagnosis

| Tested: known <i>BRCA1/2</i> GPV status | All EOC patients<br>n=250 |      |        |
|-----------------------------------------|---------------------------|------|--------|
|                                         | n                         | %    | Cum. % |
| Within 1 year                           | 159                       | 63.6 | 63.6   |
| After 1 to 1.5 years                    | 24                        | 9.6  | 73.2   |
| After 1.5 to 2 years                    | 8                         | 3.2  | 76.4   |
| After 2 to 2.5 years                    | 4                         | 1.6  | 78.0   |
| After 2.5 to 3 years                    | 2                         | 0.8  | 78.8   |
| After 3 to 5 years                      | 4                         | 1.6  | 80.4   |
| N/A, unknown <i>BRCA1/2</i> GPV status  | 49                        | 19.6 | 100.0  |

Abbreviations: Cum, cumulative; GPV, germline pathogenic variant.

Table S2: *BRCA1/2* pathogenic variants by histological subtype (HGSC versus non-HGSC) for all tested patients and by period of diagnosis (period I and period II)

|                                  | All tested patients<br>n=201 |       | Tested patients diagnosed in period I <sup>a</sup><br>n=137 |       | Tested patients diagnosed in period II <sup>a</sup><br>n=64 |       |
|----------------------------------|------------------------------|-------|-------------------------------------------------------------|-------|-------------------------------------------------------------|-------|
|                                  | n                            | %     | n                                                           | %     | n                                                           | %     |
| <b><i>BRCA1/2</i> GPV</b>        | 15                           | 7.5   | 11                                                          | 8.0   | 4                                                           | 6.3   |
| <i>HGSC</i>                      | 15                           | 100.0 | 11                                                          | 100.0 | 4                                                           | 100.0 |
| Non- <i>HGSC</i>                 | -                            | -     | -                                                           | -     | -                                                           | -     |
| <b>Somatic <i>BRCA1/2</i> PV</b> | 9                            | 4.5   | 4                                                           | 2.9   | 5                                                           | 7.8   |
| <i>HGSC</i>                      | 9                            | 100.0 | 4                                                           | 100.0 | 5                                                           | 100.0 |
| Non- <i>HGSC</i>                 | -                            | -     | -                                                           | -     | -                                                           | -     |

Abbreviations: GPV, germline pathogenic variant; *HGSC*, high-grade serous carcinoma; PV, pathogenic variant. <sup>a</sup> Period I: January 1, 2016, until July 1, 2018. Period II: July 1, 2018, until January 1, 2020.

Table S3: Potential predictors of receiving *BRCA1/2* testing (multivariable logistic regression)

| <b>Variables</b>              | <b>OR (95% CI)</b> | <b>P value</b> |
|-------------------------------|--------------------|----------------|
| <b>Age at diagnosis</b>       | 0.96 (0.93-0.99)   | 0.012          |
| <b>Histology at diagnosis</b> |                    |                |
| HGSC (ref.)                   | 1.00               | -              |
| Non-HGSC                      | 0.23 (0.11-0.46)   | <0.001         |
| Adenocarcinoma NOS            | 0.29 (0.04-1.89)   | 0.195          |
| <b>Period of diagnosis</b>    | 1.11 (0.54-2.28)   | 0.777          |

Abbreviations: OR, odds ratio; CI, confidence interval; HGSC, high-grade serous carcinoma; ref, reference; NOS, not otherwise specified.
